# Supplementary material for: Agrobacterium-Mediated Transformation of pMDC140 Plasmid Containing the Wheatwin2 Gene into the Tadong Rice Genome
Source: MDPI journal article supplement (doi:10.3390/agronomy11061072), 2021-05-26
Supplement: s1 [file s1]

**Gene:** wwin2

**NCBI Database:** AJ006099.1

**Total length:** 692 bp

GAT ATC CAA ATA ATG ATT TTA TTT TGA CTG ATA GTG ACC TGT TCG TTG  
(*EcoRV*)

CAA CAA ATT GAT GAG CAA TGC TTT TTT ATA ATG CCA ACT TTG TAC AAA  
[*attL1*]

AAA GCA GGC TCC TTT AAT TAA TGC CCT  
(*PacI*)

ATGACGATGGCCGCACGCCTGATGCTGGTGGCGGCGCTGCTGTGCGCGGCG  
GCCGCGGCCGCCACGGCGCAGCAGGCGACCAACGTGCGGGGCGACGTACCA  
CTACTACCGGCCGGCGCAGAACAACCTGGGACCTGGGCGCGCCCCGCGGTGA  
GCGCCTACTGCGCGACCTGGGACGCCAGCAAGCCGCTGTCGTGGCGGTCCA  
AGTACGGGTGGACGGCGTTCTGCGGCCCGCGCGGCCACGGGCAGGCG  
GCGTGCGGCAAGTGCCTCCGGGTGACGAACCCGGCGACGGGGGCGCAGAT  
CACGGCGAGGATCGTCGACCAGTGCGCCAACGGCGGGCTGGACCTGGACT  
GGGACACCGTCTTCACCAAGATCGACACCAACGGGATCGGGTACCAGCAGG  
GCCACCTCAACGTCAACTACCAGTTCGTCGACTGCCGCGACTAG  
AAG GGC TGG CGC GCC GAC CCA GCT TTC TTG TAC AAA GTT GGC ATT ATA  
(*AscI*)

AAA AAT AAT TGC TCA TCA ATT TGT TGC AAC GAA CAG GTC ACT ATC AGT  
[*attL2*]

CAA AAT AAA ATC ATT ATT TGG ATA TC  
(*EcoRV*)
